# Supplementary material for: High-responsivity solution-processed organic–inorganic hybrid bilayer thin film photoconductors
Source: Royal Society of Chemistry journal article supplement (doi:10.1039/c3tc31143k), 2013-01-01
Supplement: c3tc31143k.pdf [file c3tc31143k.pdf]

## Supporting Information

### High-responsivity solution-processed organic-inorganic hybrid bilayer thin film photoconductors

Zhiwen Jin <sup>a,b</sup> and Jizheng Wang\*<sup>a</sup>

a Beijing National Laboratory for Molecular Sciences, CAS Key Laboratory of Organic Solids, Institute of Chemistry, Chinese Academy of Sciences, Beijing 100190, China. E-mail: [jizheng@iccas.ac.cn](mailto:jizheng@iccas.ac.cn) Address,

b University of Chinese Academy of Sciences, Beijing 100049, China

#### Contents

1. FET performances of the used films
2. Molecular structures of the used organic materials
3. Absorption spectra of the used organic films

## 1. FET performances of the used films

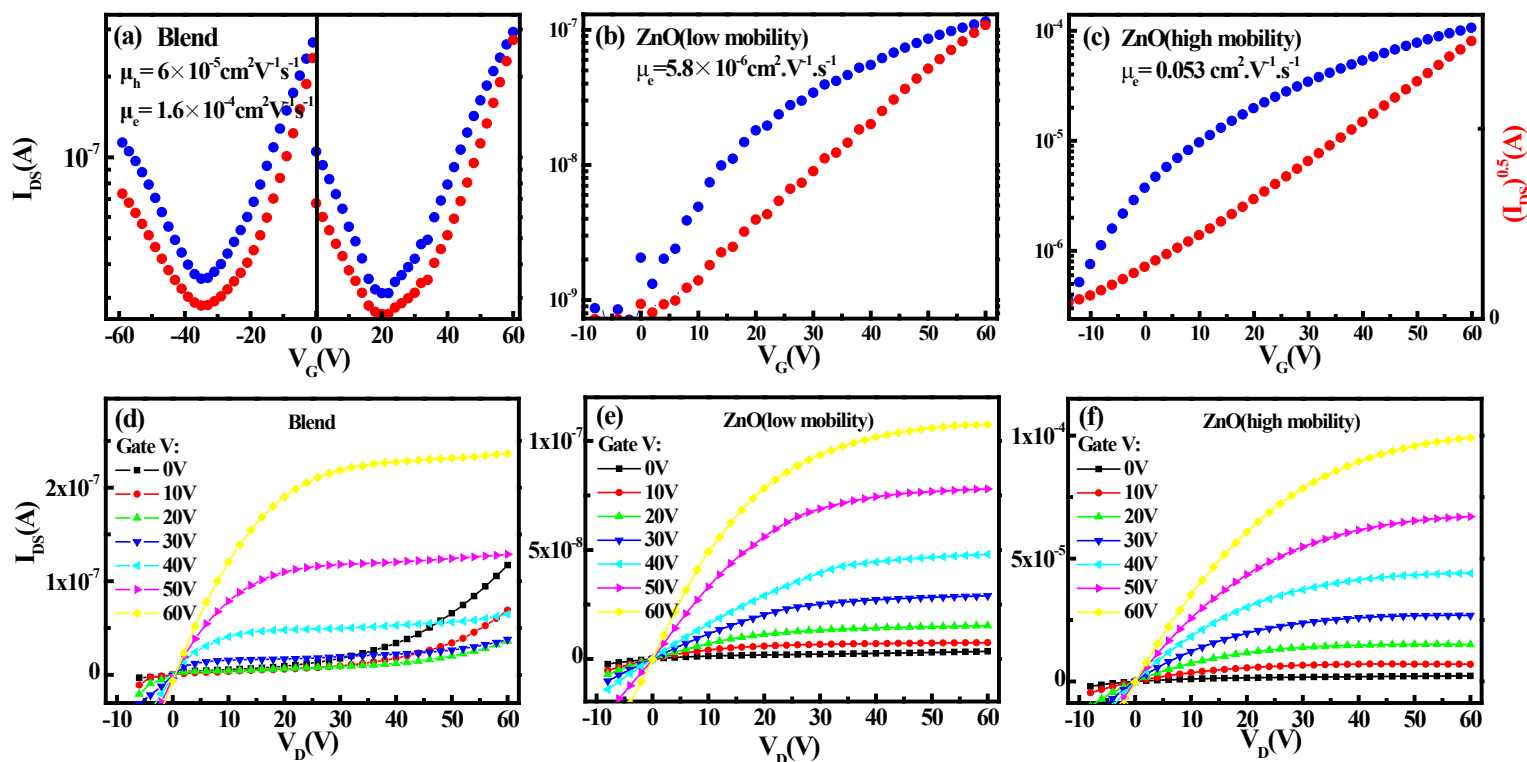

**Figure S1.** The FET performances of the used films. (a) and (d) : P3HT:PCBM blend film. (b) and (e): the low-mobility ZnO film. (c) and (f): the high-mobility ZnO film. (The thin-film transistors were fabricated by directly spin-coating the active layer on  $\text{SiO}_2$  (300 nm)/ $\text{Si}^+$  substrates, followed by thermal deposition of 50 nm-thick Al electrodes via a shadow mask, resulting in a channel width of 8800  $\mu\text{m}$  and a channel length of 80  $\mu\text{m}$ .)

## 2. Molecular structures of the used organic materials

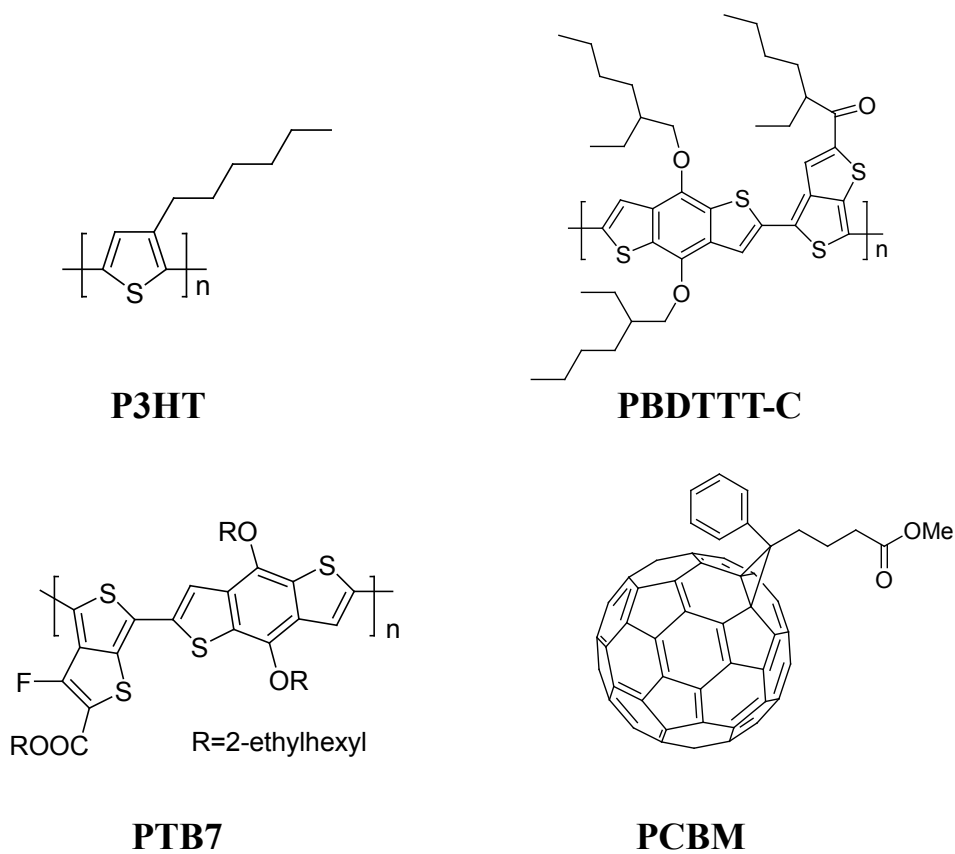

**Figure S2.** The molecular structures of the used organic materials.

### 3. Absorption spectra of the used organic films

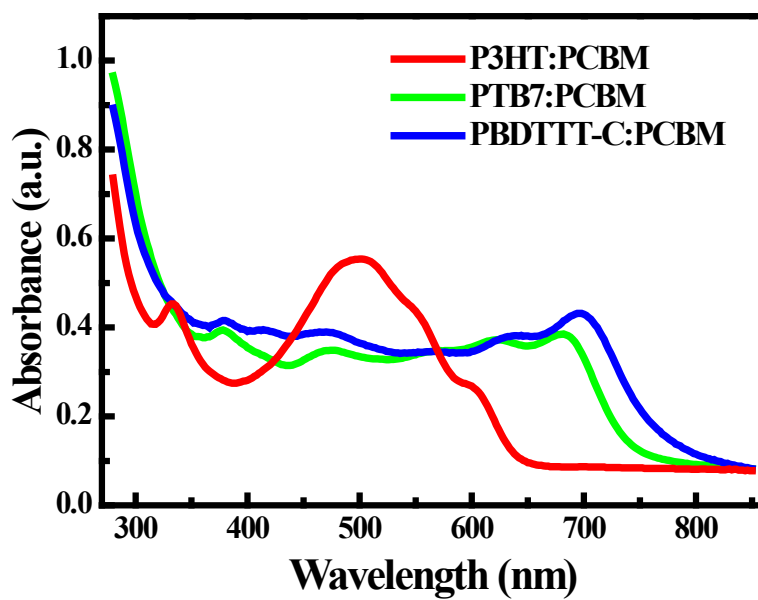

**Figure S3.** Absorption spectra of the used materials (P3HT: PCBM film , PTB7: PCBM film and PBDTTT-C: PCBM film).
